# Supplementary material for: Anti-Obesity Effect of Ginkgo Vinegar, a Fermented Product of Ginkgo Seed Coat, in Mice Fed a High-Fat Diet and 3T3-L1 Preadipocyte Cells
Source: MDPI journal article supplement (doi:10.3390/nu12010230), 2020-01-16
Supplement: s1 [file s1]

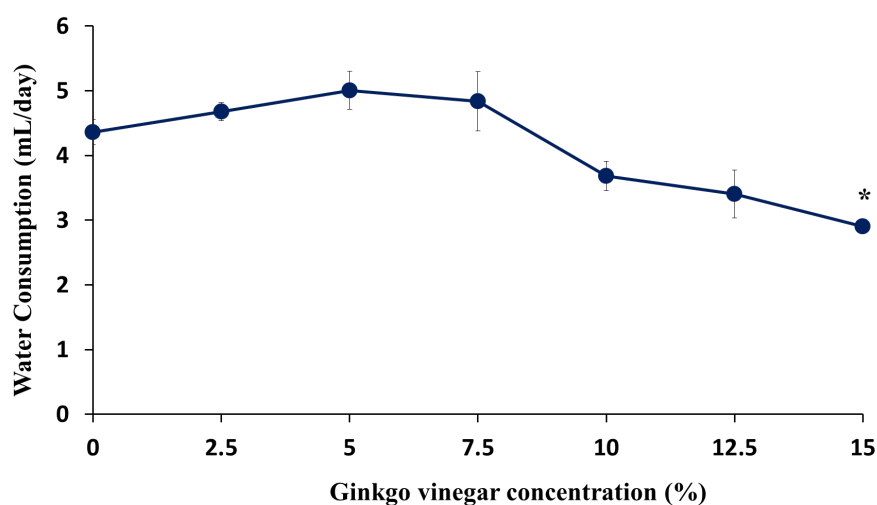

**Figure S1.** Changes in the consumption of drinking water containing various concentrations of ginkgo vinegar. Mice were given drinking water containing 0%, 2.5%, 5.0%, 7.5%, 10.0%, 12.5% or 15.0% ginkgo vinegar for 3 days. Consumption of the drinking water is illustrated as mL/day/mouse. Data represent mean  $\pm$  SD ( $n = 3$ ). \*  $p < 0.5$ , Dunnett's test.

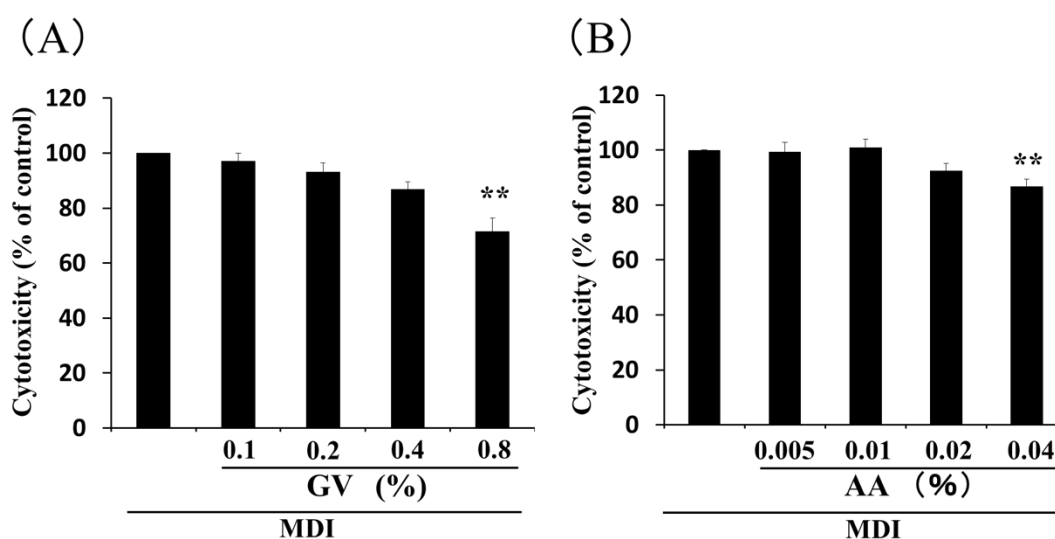

**Figure S2.** Cytotoxicity of various concentrations of ginkgo vinegar (A) and acetic acid (B) on 3T3-L1 cells. 3T3-L1 cells were induced into adipocytes with MDI medium in the presence of 0.1%–0.8% ginkgo vinegar (GV) or 0.005%–0.04% acetic acid for 2 days. Cell viability was assessed by trypan blue dye exclusion test. Data represent mean  $\pm$  SD ( $n = 5$ ). \*\*  $p < 0.01$  vs. MDI.

**Table S1.** Effect of ginkgo vinegar and HFD on serum cholesterol and triglyceride in mice.

|        | STD + Water      | HFD + Water      | HFD + 2.5% GV    | HFD + 5.0% GV    | HFD + 7.5% GV   |
|--------|------------------|------------------|------------------|------------------|-----------------|
| T-CHOL | 147.5 $\pm$ 11.1 | 178.2 $\pm$ 45.6 | 149.2 $\pm$ 20.3 | 139.8 $\pm$ 45.9 | 159.1 $\pm$ 7.1 |
| TG     | 27.3 $\pm$ 5.3   | 30.0 $\pm$ 8.8   | 41.2 $\pm$ 8.6   | 33.8 $\pm$ 11.9  | 33.8 $\pm$ 22.1 |

Mice were fed either normal chow (STD) or HFD with drinking water containing 0 (water), 2.5%, 5.0% or 7.5% ginkgo vinegar (GV) for 10 weeks. Serum levels of total cholesterol (T-CHOL) and triglyceride (TG) were analyzed (mg/dL) in Fuji Film VET Systems Co Ltd. (Tokyo, Japan). Data represent mean  $\pm$  SD ( $n = 3$ –5).
